# Supplementary material for: Tracking slow-moving landslides with PlanetScope data: new perspectives on the satellite's perspective
Source: Copernicus journal article supplement (doi:10.5194/esurf-12-1121-2024), 2024-10-01
Supplement: Supplementary file 1 [file esurf-12-1121-2024-supplement.pdf]

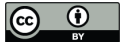

*Supplement of*

## **Tracking slow-moving landslides with PlanetScope data: new perspectives on the satellite's perspective**

**Ariane Mueting and Bodo Bookhagen**

*Correspondence to:* Ariane Mueting ([mueting@uni-potsdam.de](mailto:mueting@uni-potsdam.de))

The copyright of individual parts of the supplement might differ from the article licence.

## 1 PlanetScope data

The following tables list scene IDs and acquisition parameters of all PlanetScope data used in this study. The quality column indicates whether images have passed all image quality metrics in the processing pipeline. The use of the quality category "standard" is recommended. We included a few "test" images, particularly for the identification of the orthorectification error  
5 signal at the Siguas site, to keep a short temporal baseline (Table S3).

**Table S1.** List of PlanetScope L3B scenes and corresponding metadata used for offset tracking across the Sigüas landslide separated by processing groups.

| <b>Group</b>            | <b>Scene ID</b>         | <b>Date of Acquisition</b> | <b>View Angle</b> | <b>Satellite Azimuth</b> | <b>Quality</b> |
|-------------------------|-------------------------|----------------------------|-------------------|--------------------------|----------------|
| 1                       | 20200717_141850_23_2278 | 2020-07-17                 | 3.9               | 279.4                    | standard       |
|                         | 20210302_142459_17_2231 | 2021-03-02                 | 4                 | 278.4                    | standard       |
|                         | 20210901_141429_62_242b | 2021-09-01                 | 4.1               | 279.3                    | standard       |
|                         | 20220108_141431_75_2212 | 2022-01-08                 | 4                 | 279.4                    | standard       |
|                         | 20220220_144136_13_2490 | 2022-02-20                 | 4                 | 279.3                    | standard       |
|                         | 20220707_144112_41_247c | 2022-07-07                 | 4.1               | 278.3                    | standard       |
|                         | 20221221_140616_42_2430 | 2022-12-21                 | 4.5               | 278.6                    | standard       |
| 2                       | 20201122_150654_13_2416 | 2020-11-22                 | 3                 | 96.2                     | test           |
|                         | 20210111_150637_23_2406 | 2021-01-11                 | 3                 | 96.3                     | standard       |
|                         | 20210406_142246_83_2231 | 2021-04-06                 | 3                 | 97.9                     | standard       |
|                         | 20211002_141111_60_2428 | 2021-10-02                 | 3.1               | 95.9                     | standard       |
|                         | 20211208_141111_53_2465 | 2021-12-08                 | 3                 | 96.3                     | standard       |
|                         | 20220413_140614_39_2455 | 2022-04-13                 | 3                 | 95.9                     | standard       |
|                         | 20220629_142321_02_2251 | 2022-06-29                 | 3                 | 95.7                     | standard       |
|                         | 20221215_145536_42_2413 | 2022-12-15                 | 3.3               | 96                       | standard       |
| 20230228_144044_35_2489 | 2023-02-28              | 3.1                        | 94.4              | standard                 |                |
| 3                       | 20200329_141432_68_2271 | 2020-03-29                 | 0.1               | 2                        | standard       |
|                         | 20200926_150927_49_241c | 2020-09-26                 | 0.1               | 355.1                    | test           |
|                         | 20201113_142248_59_2441 | 2020-11-13                 | 0.2               | 3.3                      | standard       |
|                         | 20210307_150627_51_2401 | 2021-03-07                 | 0.2               | 348.7                    | standard       |
|                         | 20210514_141500_24_2458 | 2021-05-14                 | 0.1               | 359.1                    | standard       |
|                         | 20210702_141333_57_2460 | 2021-07-02                 | 0.2               | 345.7                    | standard       |
|                         | 20210921_141221_26_2464 | 2021-09-21                 | 0.3               | 4                        | standard       |
|                         | 20220616_143858_18_2488 | 2022-06-16                 | 0.1               | 2.6                      | standard       |
|                         | 20221020_143849_06_2488 | 2022-10-20                 | 0.4               | 14.8                     | standard       |
| 4                       | 20200926_150927_49_241c | 2020-09-26                 | 0.1               | 355.1                    | test           |
|                         | 20210309_142212_90_222f | 2021-03-09                 | 5                 | 96.5                     | standard       |
|                         | 20210705_141517_63_241a | 2021-07-05                 | 5                 | 279                      | standard       |
|                         | 20220506_140845_16_2439 | 2022-05-06                 | 1                 | 91.9                     | standard       |
|                         | 20221002_143906_84_2495 | 2022-10-02                 | 2                 | 95.2                     | standard       |
|                         | 20221206_143747_18_2488 | 2022-12-06                 | 4.9               | 96.6                     | standard       |
|                         | 20230106_140514_50_2429 | 2023-01-06                 | 1.2               | 281.3                    | standard       |
| 20230305_144147_03_24a5 | 2023-03-05              | 3.8                        | 279.1             | standard                 |                |

**Table S2.** List of PlanetScope L3B scenes and corresponding metadata used for offset tracking across the Del Medio landslide separated by processing groups.

| <b>Group</b>            | <b>Scene ID</b>         | <b>Date of Acquisition</b> | <b>View Angle</b> | <b>Satellite Azimuth</b> | <b>Quality</b> |
|-------------------------|-------------------------|----------------------------|-------------------|--------------------------|----------------|
| 1                       | 20200516_134707_21_2277 | 2020-05-16                 | 5                 | 279.8                    | standard       |
|                         | 20200729_134905_10_2277 | 2020-07-29                 | 5                 | 279.6                    | standard       |
|                         | 20200905_134846_16_222b | 2020-09-05                 | 4.9               | 279.5                    | standard       |
|                         | 20201005_135131_66_2277 | 2020-10-05                 | 5                 | 279.5                    | standard       |
|                         | 20210316_134737_82_241e | 2021-03-16                 | 5.1               | 279.8                    | standard       |
|                         | 20210531_134614_85_241e | 2021-05-31                 | 5                 | 279.6                    | standard       |
|                         | 20220505_133805_86_242b | 2022-05-05                 | 5                 | 279.3                    | standard       |
|                         | 20220619_141044_55_24a4 | 2022-06-19                 | 5                 | 279.5                    | standard       |
|                         | 20220827_142307_95_2274 | 2022-08-27                 | 5                 | 279.5                    | standard       |
|                         | 20230220_132456_32_2445 | 2023-02-20                 | 5.1               | 279.3                    | standard       |
| 2                       | 20210603_134145_29_2456 | 2021-06-03                 | 4                 | 96.3                     | standard       |
|                         | 20210710_134242_08_2465 | 2021-07-10                 | 4                 | 96.2                     | standard       |
|                         | 20210926_142938_21_2274 | 2021-09-26                 | 4                 | 95.1                     | standard       |
|                         | 20220602_135219_78_2251 | 2022-06-02                 | 4                 | 96.4                     | standard       |
|                         | 20220915_141739_37_227b | 2022-09-15                 | 4                 | 96.5                     | standard       |
|                         | 20221227_140803_96_247d | 2022-12-27                 | 4.3               | 96.3                     | standard       |
|                         | 20230428_141134_83_2481 | 2023-04-28                 | 4.4               | 96.8                     | standard       |
| 3                       | 20200328_134314_64_2263 | 2020-03-28                 | 0.1               | 326.7                    | standard       |
|                         | 20200909_143842_94_227a | 2020-09-09                 | 0.1               | 4.6                      | standard       |
|                         | 20210420_134520_10_242d | 2021-04-20                 | 0                 | 2.8                      | standard       |
|                         | 20210815_143231_23_2426 | 2021-08-15                 | 0.1               | 5                        | standard       |
|                         | 20211127_133936_00_2455 | 2021-11-27                 | 0.1               | 358                      | test           |
|                         | 20220323_140918_59_2485 | 2022-03-23                 | 0.1               | 10.2                     | standard       |
|                         | 20220823_133629_45_2465 | 2022-08-23                 | 0.1               | 0.5                      | standard       |
|                         | 20221101_140857_70_2490 | 2022-11-01                 | 0.1               | 355.7                    | standard       |
| 20230425_141309_40_247b | 2023-04-25              | 0                          | 359.2             | standard                 |                |
| 4                       | 20200909_143842_94_227a | 2020-09-09                 | 0.1               | 4.6                      | standard       |
|                         | 20201114_135258_85_2251 | 2020-11-14                 | 3.1               | 280.5                    | standard       |
|                         | 20210516_134349_86_2235 | 2021-05-16                 | 5                 | 96.6                     | standard       |
|                         | 20210710_134242_08_2465 | 2021-07-10                 | 4                 | 96.2                     | standard       |
|                         | 20211002_133911_53_2435 | 2021-10-02                 | 5                 | 96.7                     | standard       |
|                         | 20220506_140832_67_249d | 2022-05-06                 | 2                 | 94.4                     | standard       |
|                         | 20220610_133641_11_2429 | 2022-06-10                 | 2.1               | 94.4                     | standard       |
|                         | 20220904_135644_53_2276 | 2022-09-04                 | 4.7               | 279.4                    | standard       |
| 20230511_133814_07_242d | 2023-05-11              | 1.4                        | 285               | standard                 |                |

**Table S3.** List of PlanetScope L3B scenes and corresponding metadata across the Siguas landslide acquired within an approx. 1.5 month period. All scenes were correlated with each other to determine which acquisition parameters determine the strength of the orthorectification error seen in the displacement maps, see Supplementary Figure S2.

| Scene ID                | Date of Acquisition | View Angle | Satellite Azimuth | Quality  |
|-------------------------|---------------------|------------|-------------------|----------|
| 20220707_144112_41_247c | 2022-07-07          | 4.1        | 278.3             | standard |
| 20220712_142347_87_2262 | 2022-07-12          | 5          | 278.6             | standard |
| 20220713_141250_01_2212 | 2022-07-13          | 0.1        | 353.3             | standard |
| 20220716_144128_52_2478 | 2022-07-16          | 5          | 278.8             | standard |
| 20220717_143827_66_2470 | 2022-07-17          | 4          | 96.5              | standard |
| 20220723_143904_82_2478 | 2022-07-23          | 0.1        | 359.4             | standard |
| 20220724_140731_82_245c | 2022-07-24          | 1.1        | 283               | standard |
| 20220731_145317_96_2414 | 2022-07-31          | 3          | 94.3              | test     |
| 20220801_143753_11_2490 | 2022-08-01          | 5          | 96.8              | test     |
| 20220802_143920_28_2480 | 2022-08-02          | 1          | 281.4             | test     |
| 20220803_144118_87_2482 | 2022-08-03          | 5          | 278.8             | test     |
| 20220804_140158_24_2460 | 2022-08-04          | 5          | 96.8              | standard |
| 20220806_145017_17_2424 | 2022-08-06          | 0.6        | 8.3               | test     |
| 20220809_145704_40_2426 | 2022-08-09          | 4          | 279               | test     |
| 20220812_140836_60_241f | 2022-08-12          | 4          | 279.2             | standard |
| 20220814_143747_50_248b | 2022-08-14          | 4          | 96.2              | standard |
| 20220823_145618_97_2407 | 2022-08-23          | 0.1        | 348.9             | standard |

**Table S4.** List of PlanetScope L1B scenes and corresponding metadata used for DEM generation at the Siguas and Del Medio landslide.

| Site      | Scene ID                | Date of Acquisition | View Angle | Satellite Azimuth | Quality  |
|-----------|-------------------------|---------------------|------------|-------------------|----------|
| Siguas    | 20220702_145351_89_240c | 2022-07-02          | 5.1        | 96.6              | standard |
|           | 20220706_144107_59_24a3 | 2022-07-06          | 5.1        | 278.7             | standard |
| Del Medio | 20220907_140709_64_24a3 | 2022-09-07          | 5          | 96.9              | standard |
|           | 20220912_141056_91_2486 | 2022-09-12          | 5          | 279.4             | standard |

**Table S5.** List of PlanetScope L1B scenes used to assess the displacement bias resulting from orthorectification errors as a function of DEM error and view-angle difference.

| <b>Scene ID</b>         | <b>Date of Acquisition</b> | <b>View Angle</b> | <b>Satellite Azimuth</b> | <b>Quality</b> |
|-------------------------|----------------------------|-------------------|--------------------------|----------------|
| 20220723_143904_82_2478 | 2022-07-23                 | 0.1               | 359.4                    | standard       |
| 20220724_140731_82_245c | 2022-07-24                 | 1.1               | 283                      | standard       |
| 20220813_140539_75_2435 | 2022-08-13                 | 2                 | 280.4                    | standard       |
| 20220826_140449_19_2464 | 2022-08-26                 | 2                 | 95                       | standard       |
| 20220731_145317_96_2414 | 2022-07-31                 | 3                 | 94.3                     | test           |
| 20220730_143816_40_247e | 2022-07-30                 | 4                 | 96.3                     | standard       |
| 20220811_144114_93_247b | 2022-08-11                 | 4.7               | 281.8                    | standard       |
| 20220722_140559_29_2458 | 2022-07-22                 | 5                 | 96.7                     | standard       |
| 20220712_142347_87_2262 | 2022-07-12                 | 5                 | 278.6                    | standard       |
| 20220702_145351_89_240c | 2022-07-02                 | 5.1               | 96.6                     | standard       |
| 20220706_144107_59_24a3 | 2022-07-06                 | 5.1               | 278.7                    | standard       |

## 2 Supplementary figures

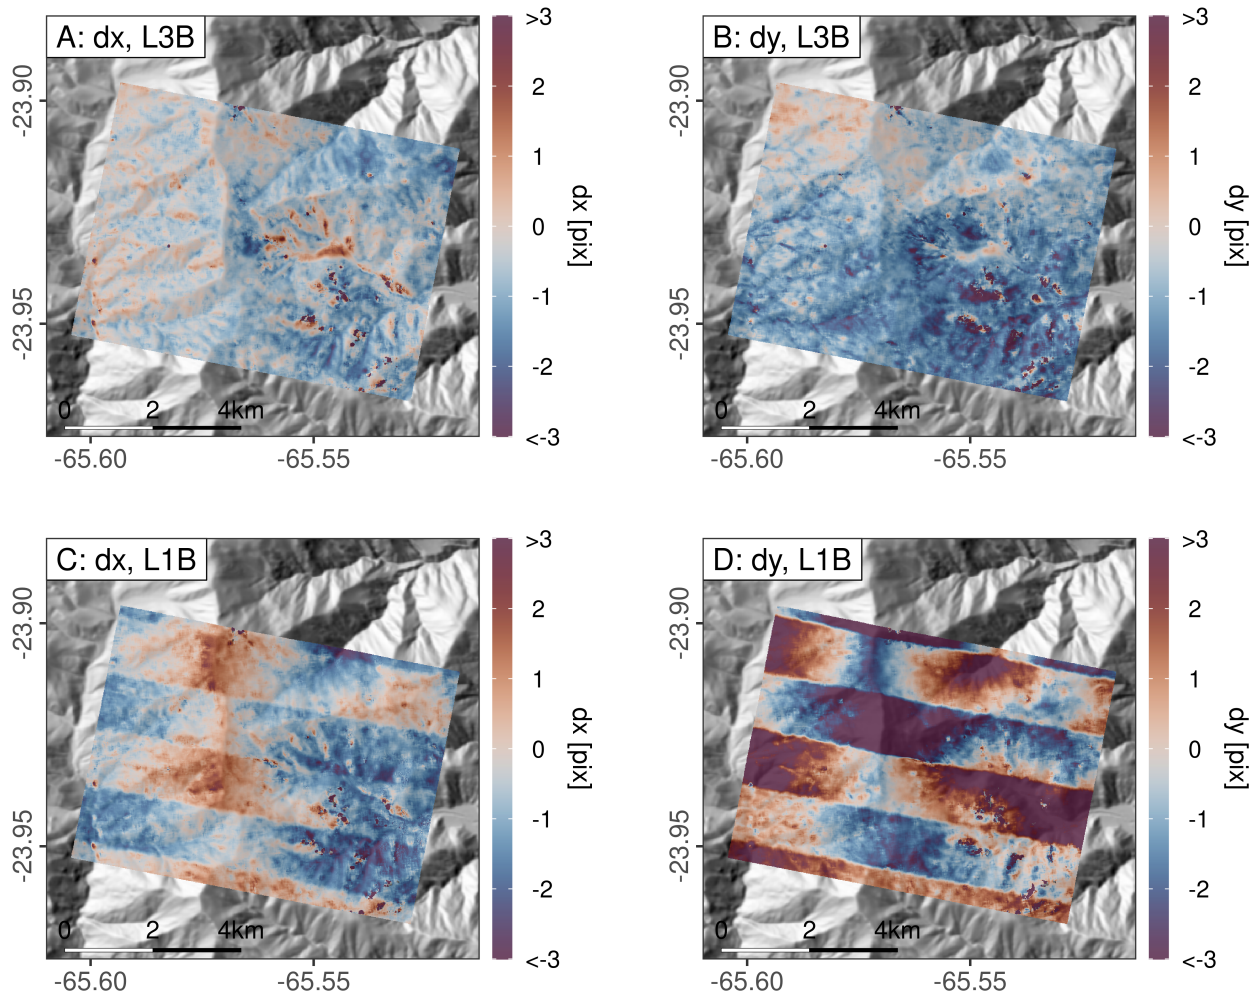

**Figure S1.** Misalignment of sub-frames composing a full PSB.SD scene can cause stripe artifacts in the obtained displacement maps. Particularly older PSB.SD acquisitions (early 2020) are affected. However, the alignment process seems to have improved for newer acquisitions and the L3B data. This Figure shows displacement maps (EW and NS direction) obtained from two PlanetScope scenes acquired on 28.03.2020 and 14.11.2020. In the L3B data, the stripes have disappeared, while the L1B data, which was manually orthorectified using a DEM derived from PlanetScope data, still show severe artifacts.

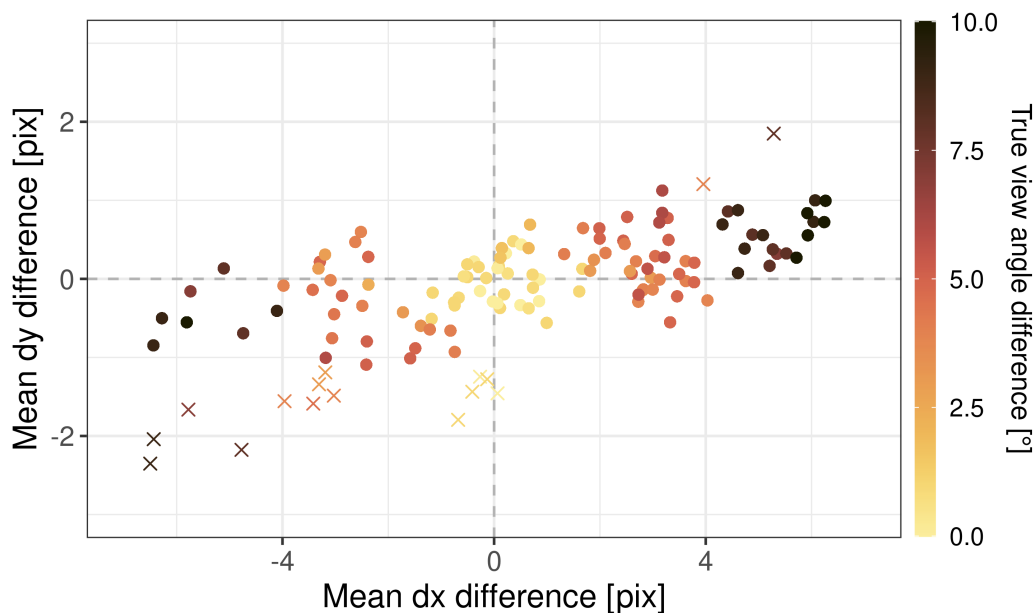

**Figure S2.** Difference of mean displacement in EW (dx) and NS (dy) directions between source and deposition area of the Sigvas landslide, derived from 136 correlation pairs of L3B scenes between July 7 and August 23, 2022 (see Table S3). The scatter plot shows the degree to which the displacement map is affected by diverging projections related to DEM errors. We generally observe a linear relationship between the strength of the DEM error signal in dx and dy, with dx showing the strongest difference. There are a few data points that deviate from this relationship and exhibit a stronger DEM error signal in the NS component (plotted as crosses instead of points). We found that all of these correlation pairs are related to a single acquisition from August 12, 2022. We assume that this increased signal in dy is related to a slightly different satellite pitch angle, which has not been recorded in the metadata. Colors represent the true view angle difference between two scenes, which considers whether a satellite is left- or right-looking (positive = east, negative = west). We find that orthorectification errors are lowest for scenes taken at common view angles from the same direction. To minimize the bias from orthorectification errors resulting from outdated DEM heights over unstable terrain, only scene pairs with minimal differences in true view angles should be considered for correlation.



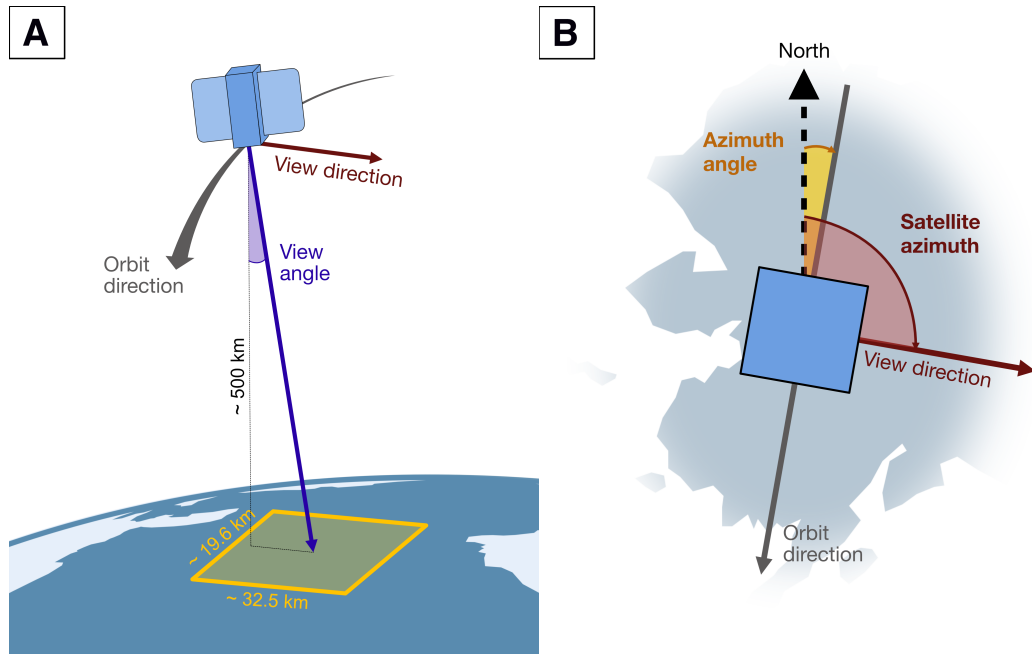

**Figure S3.** Sketch of PlanetScope satellite geometry from side (A) and top-down view (B). For reducing erroneous displacement signals related to orthorectification errors, it is essential to only correlate L3B data that was acquired from similar perspectives. This includes the view angle, which is the satellite's off-nadir viewing angle across track. In the JSON metadata of PlanetScope scenes, the view angle is always provided in positive numbers, typically ranging between 0 and 5. The off-nadir angle needs to be considered in combination with the satellite azimuth, which describes the angle between the satellite's view direction and true north (B) and ranges between 0 and 360°. The satellite azimuth thus determines if the satellite is left- or right-looking. Scenes acquired from an opposite view direction at high view angles are strongest affected by orthorectification errors. The satellite azimuth should not be confused with the azimuth angle which describes the angle between true north and the scan line direction.

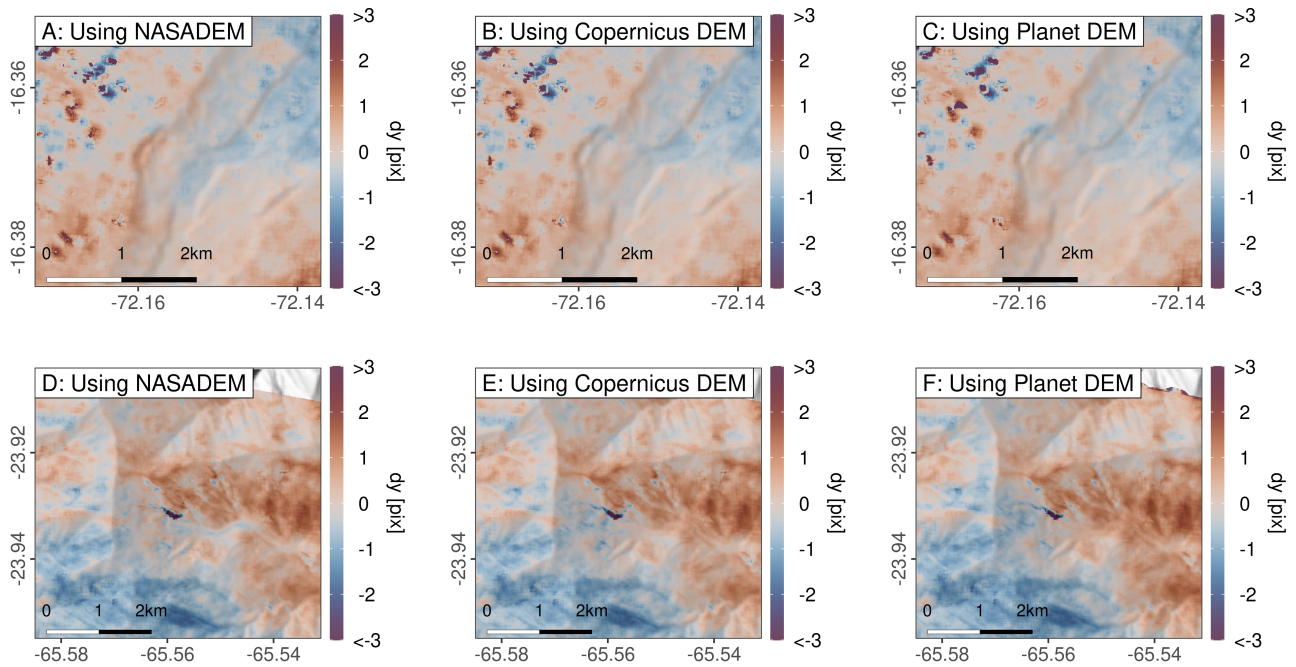

**Figure S4.** Displacement in NS direction estimated across the Siguas (A-C) and Del Medio landslides (D-F) with PlanetScope L1B scenes orthorectified using the NASADEM (A, D), the Copernicus DEM (B, E), and a DEM generated from PlanetScope L1B scenes (C, F). Displacement maps were generated from scene pairs with a minimal temporal baseline (10 days: 07.07.2022 to 17.07.2022) for A-C and 16 days (08.09.2022 to 24.09.2022) for D-F, so the surface can be assumed to be stable. Outdated DEM heights in the reference DEMs produce lateral offset signals in the displacement maps which are, however, less visible in the along-track components.

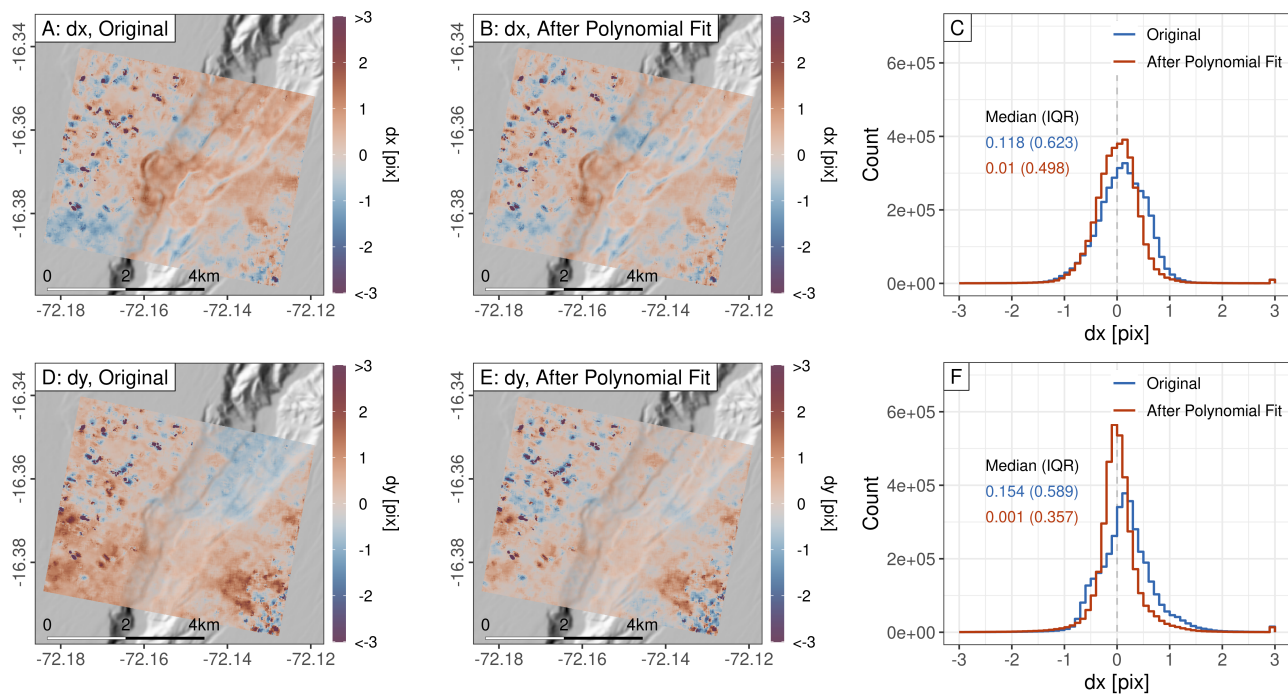

**Figure S5.** Displacement maps and value distributions estimated across the Del Medio landslide based on an orthorectified L1B scene pair 07.07.2022 and 17.07.2022 before and after the removal of systematic co-registration errors through a polynomial fit. Figures A-C show results for the dx component, Figures D-F for dy. The application of a polynomial fit results in zero-centered offset distribution with a largely reduced spread of displacement. Colored labels correspond to median and IQR of the distribution.

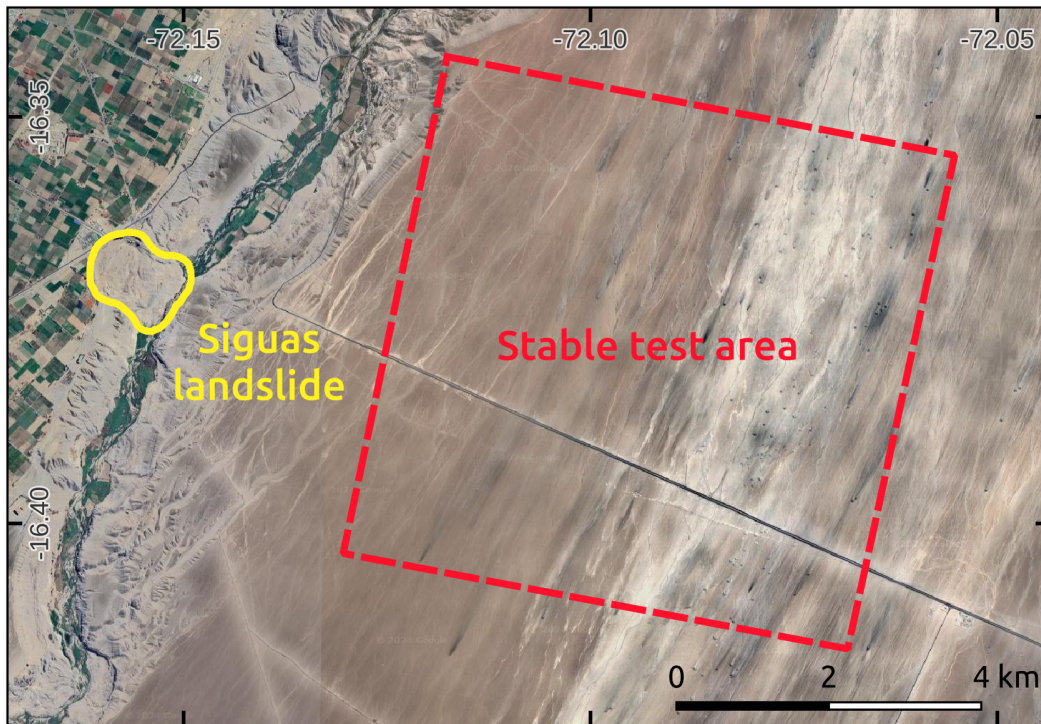

**Figure S6.** Location of the stable and predominantly low-slope area located east of the Siguas landslide used to assess the magnitude of orthorectification error resulting from wrong DEM heights affecting displacement estimates from PlanetScope images acquired from variable perspectives. Map data: Google, © 2024 CNES / Airbus, Landsat / Copernicus, Maxar Technologies

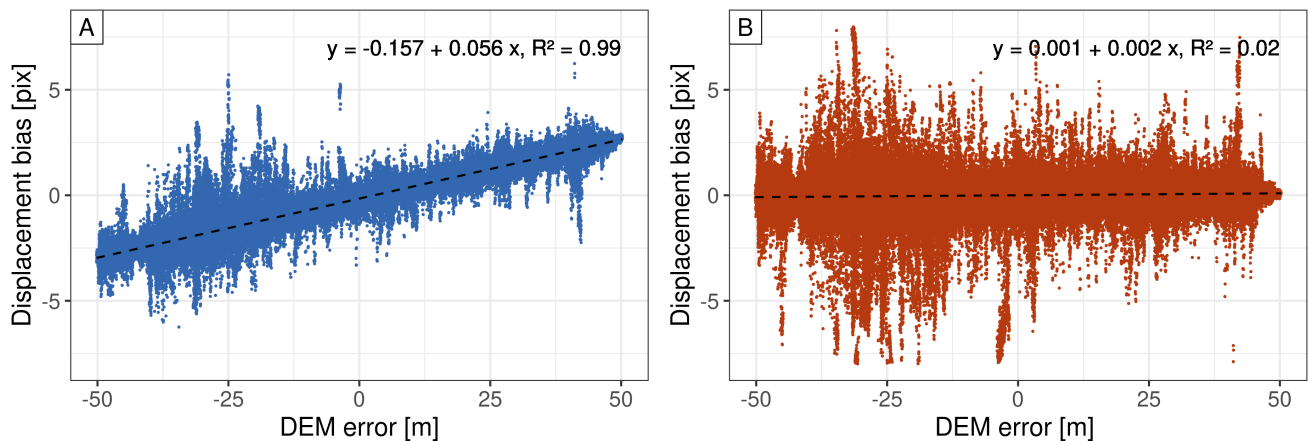

**Figure S7.** Scatter plot comparing artificially introduced elevation changes (DEM error) and resulting changes in estimated dx and dy displacement corresponding to the raster data shown in Figure 13 B and C. We observe a strong correlation between DEM error and offset in the dx component, while dy remains unaffected.

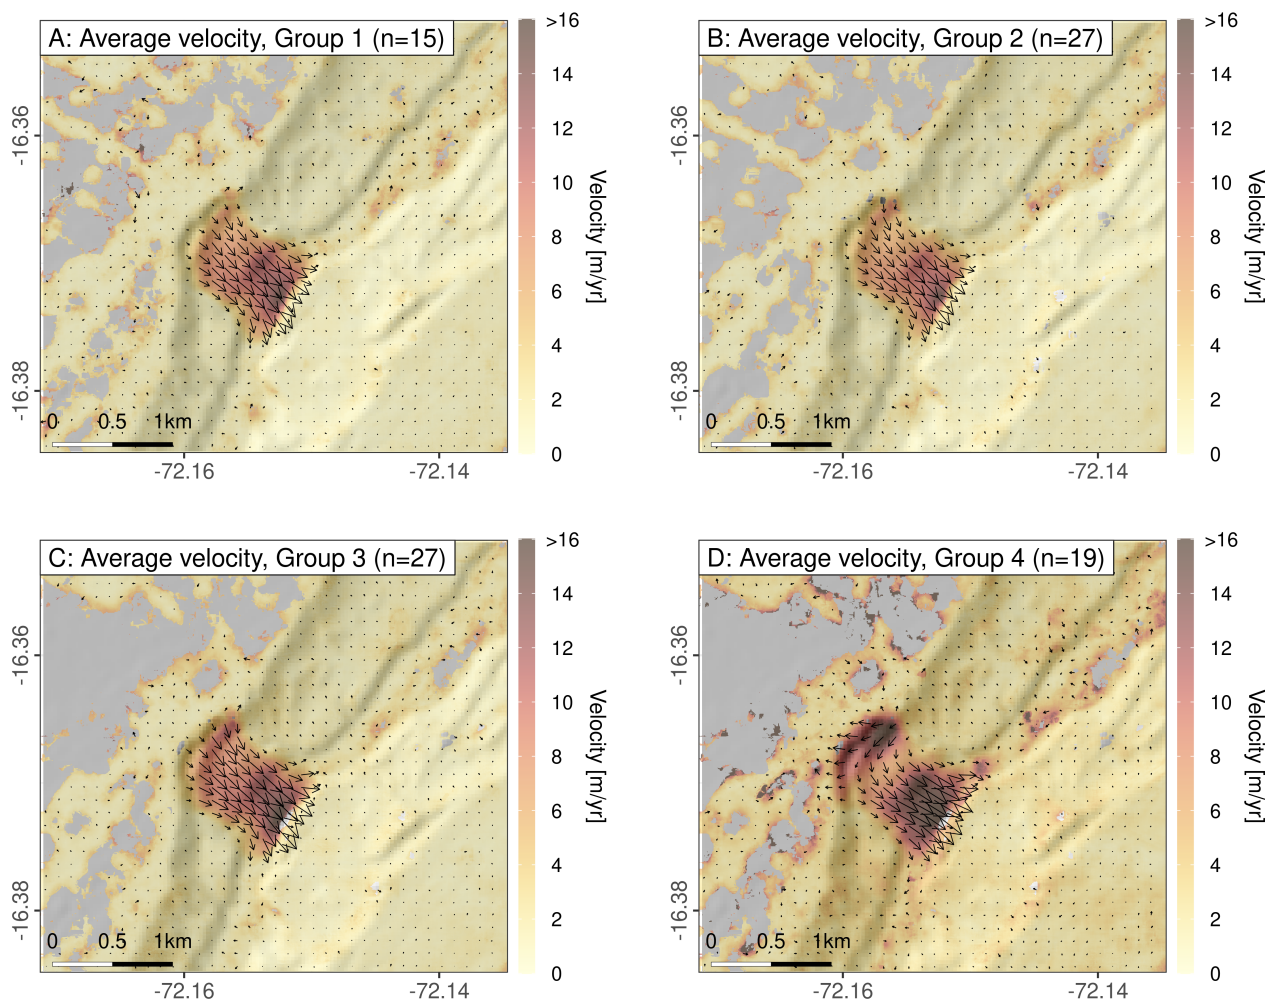

**Figure S8.** Vector plot indicating magnitude and direction of surface displacement estimated across the Sigvas landslide averaged within individual groups sharing a common view angle and satellite azimuth (A-C). Erroneous matches related to changing land cover in the agricultural area towards the northwest of the scene were removed by masking pixels with high standard deviations of velocity. If correlation pairs are not carefully but randomly selected (D), orthorectification errors will propagate to the displacement maps, suggesting elevated velocities and erroneous motion trajectories in areas where elevation changes have occurred. For the average velocity field of group 4, we apply the variance mask from group 3 (C) to mask agricultural areas, as the varying orthorectification error also results high velocity variations across the landslide. All displacement maps used to calculate velocities were optimized using a polynomial fit as described in the main manuscript.

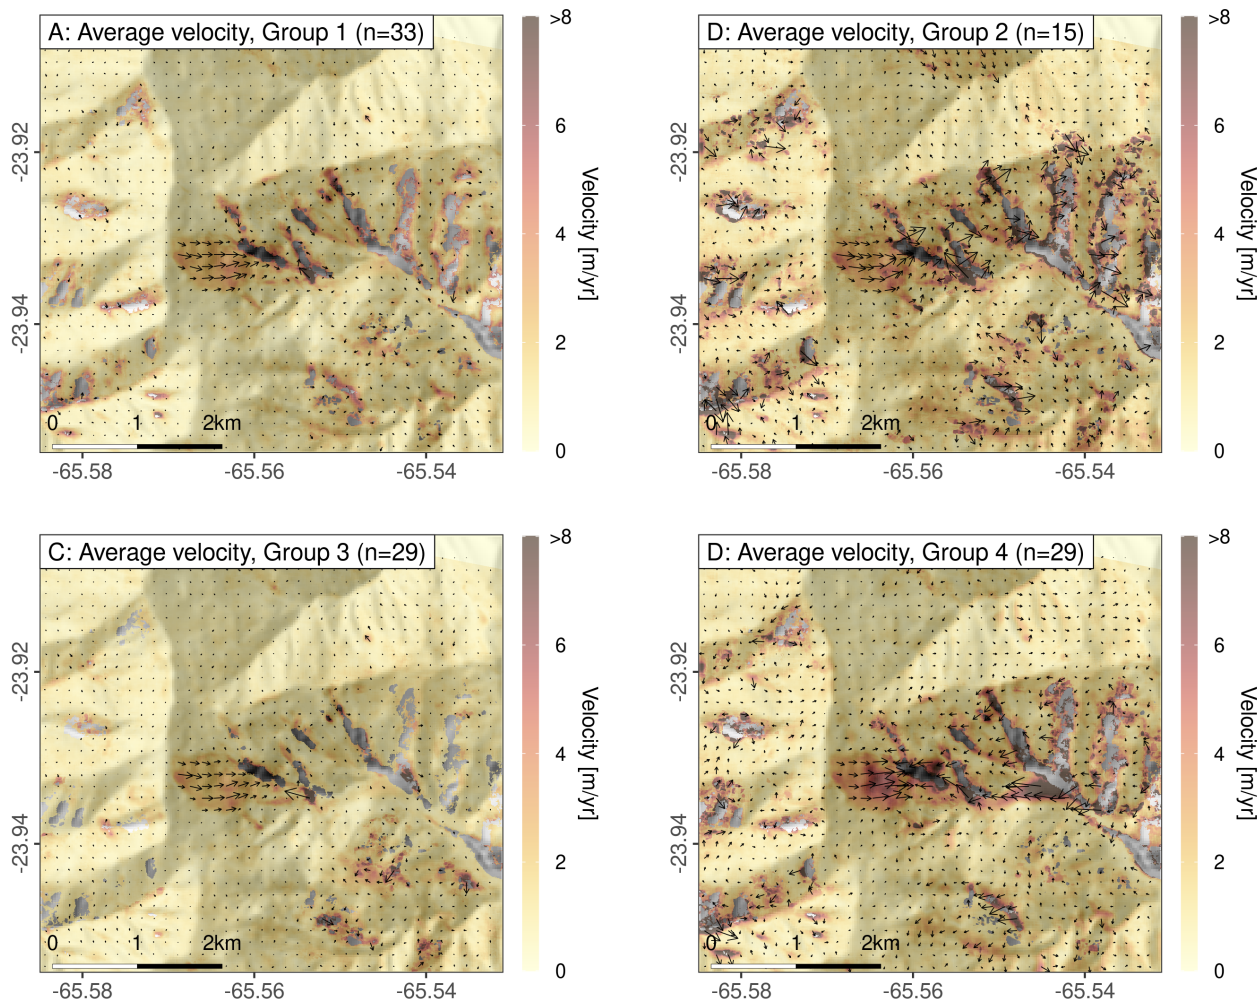

**Figure S9.** Vector plot indicating magnitude and direction of surface displacement estimated across the Del Medio landslide averaged within individual groups sharing a common view angle and satellite azimuth (A-C). Erroneous matches related to variable shading along steep cliffs and deeply incised channels were removed by masking pixels with high standard deviations of velocity. If correlation pairs are not carefully but randomly selected (D), orthorectification errors will propagate to the displacement maps, suggesting elevated velocities and erroneous motion trajectories in areas where elevation changes have occurred. For the average velocity field of group 4, we apply the variance mask from group 3 (C) to mask shadowed areas, as the varying orthorectification error also results high velocity variations across the landslide. All displacement maps used to calculate velocities were optimized using a polynomial fit as described in the main manuscript.

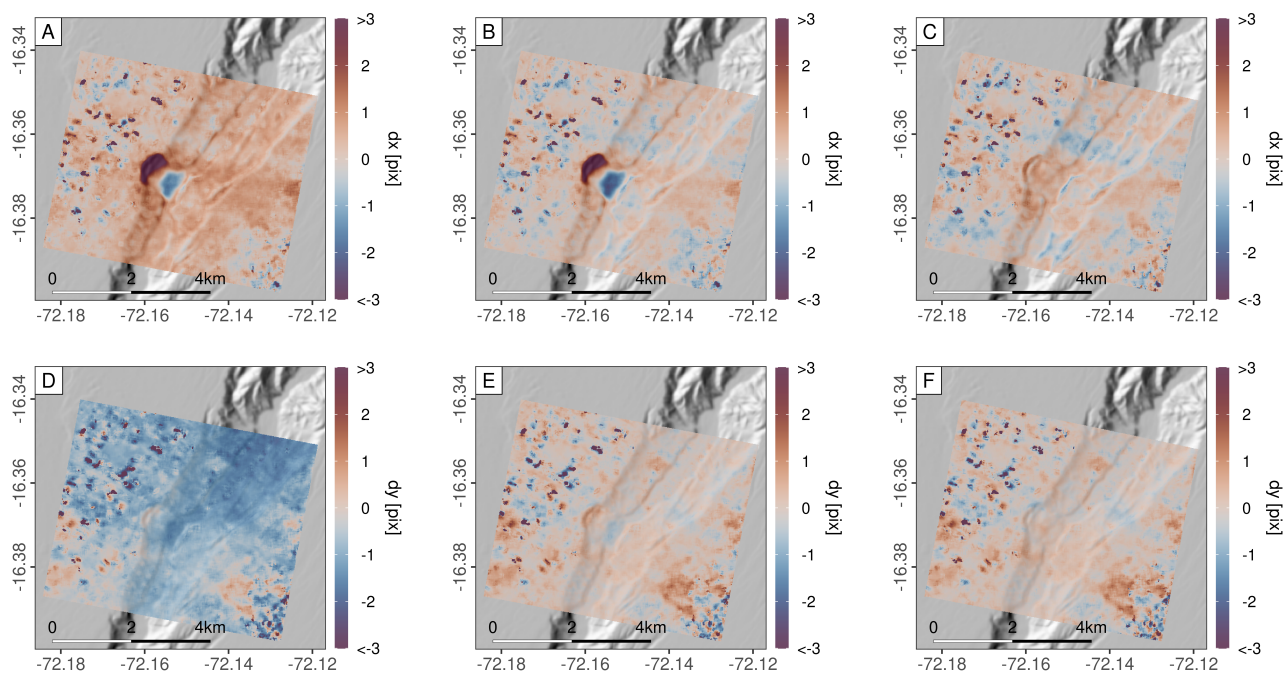

**Figure S10.** Map view of displacement maps in EW (dx) and NS (dy) directions at the Sigvas landslide derived from two PlanetScope scenes acquired on the 07.07.2022 and 17.07.2022. We compare results obtained from Level 3B scenes as downloaded from the Planet Explorer (A, D), after applying a polynomial fit to correct for margin and stereoscopic effects (B, E), and displacement derived from orthorectified L1B scenes using a DEM generated from PlanetScope data, with remaining distortions corrected using a polynomial fit (C, F). Through the correction steps proposed in this study, the co-registration accuracy between two PlanetScope scenes can be lowered to the sub-pixel range over stable terrain, which improves the differentiation of slow landslide motions from noise. Through projecting raw L1B data onto a DEM that more closely aligns with the observed topography, orthorectification errors in the area of the landslide can be significantly reduced.

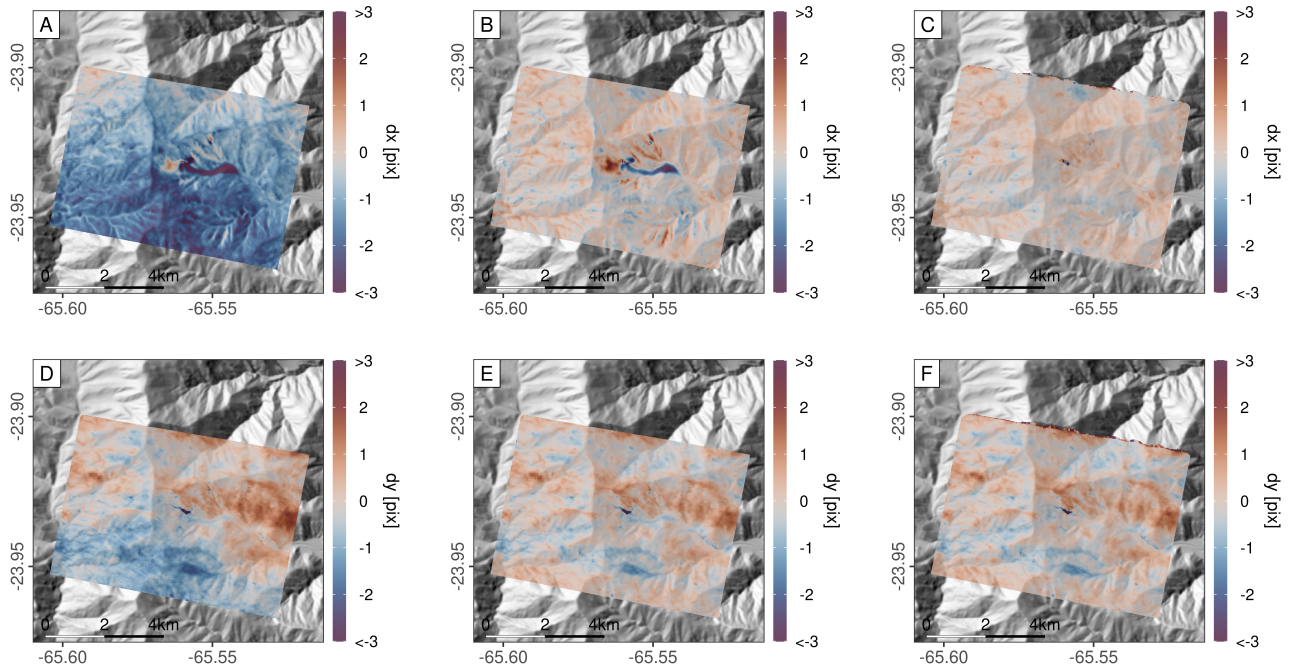

**Figure S11.** Map view of displacement maps in EW ( $dx$ ) and NS ( $dy$ ) directions at the Del Medio landslide derived from two PlanetScope scenes acquired on the 08.09.2022 and 24.09.2022. We compare results obtained from Level 3B scenes as downloaded from the Planet Explorer (A, D), after applying a polynomial fit to correct for margin and stereoscopic effects (B, E), and displacement derived from orthorectified L1B scenes using a DEM generated from PlanetScope data, with remaining distortions corrected using a polynomial fit (C, F). Through the correction steps proposed in this study, the coregistration accuracy between two PlanetScope scenes can be lowered to the sub-pixel range over stable terrain, which improves the differentiation of slow landslide motions from noise. Through projecting raw L1B data onto a DEM that more closely aligns with the observed topography, orthorectification errors in the area of the landslide can be significantly reduced.



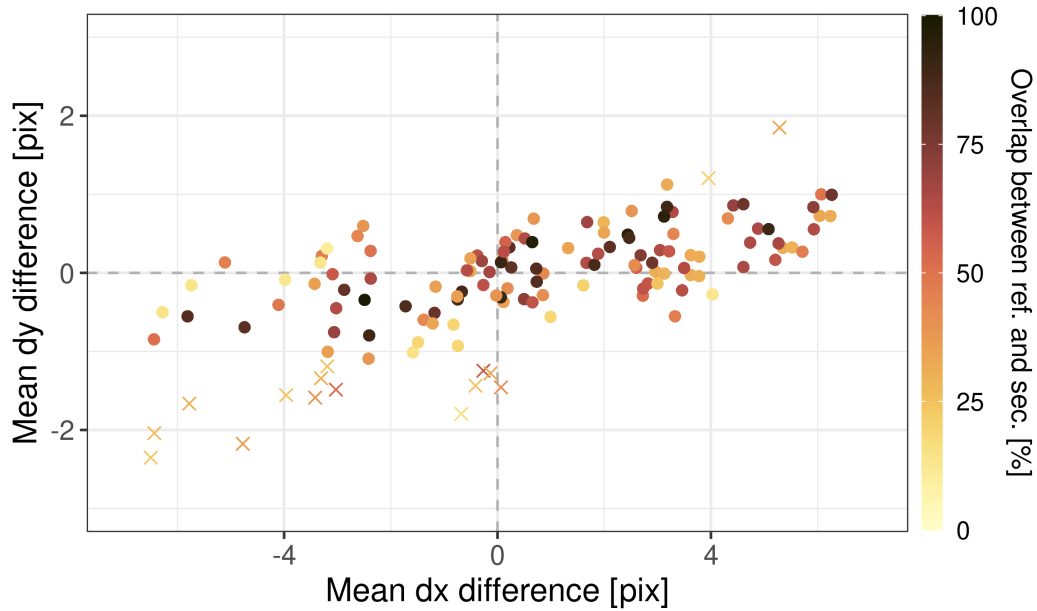

**Figure S12.** Difference of mean displacement in EW (dx) and NS (dy) directions between source and deposition area of the Sigüas landslide derived from 136 correlation pairs of L3B scenes between July 7 and August 23, 2022 (Table S3). Colors represent overlap between reference and secondary scene in percent. We find no relationship between those two parameters, indicating that the local incidence angle within a scene is negligible for predicting the orthorectification error.

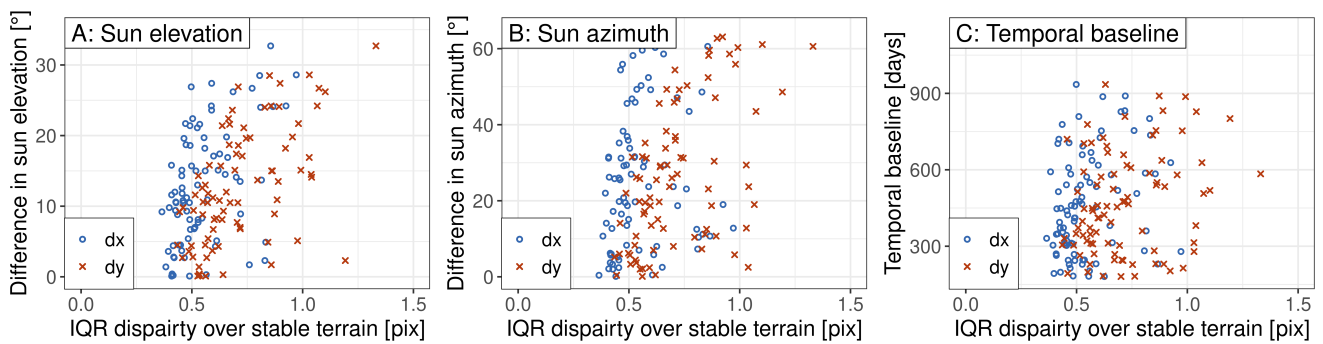

**Figure S13.** IQR of estimated displacement across stable terrain (all pixels outside landslide mask) for all L3B correlation pairs at the Sigüas ( $n = 88$ ) test site, plotted against differences in sun elevation angles (A), sun azimuth angles (B), and temporal baselines between reference and secondary images (C).

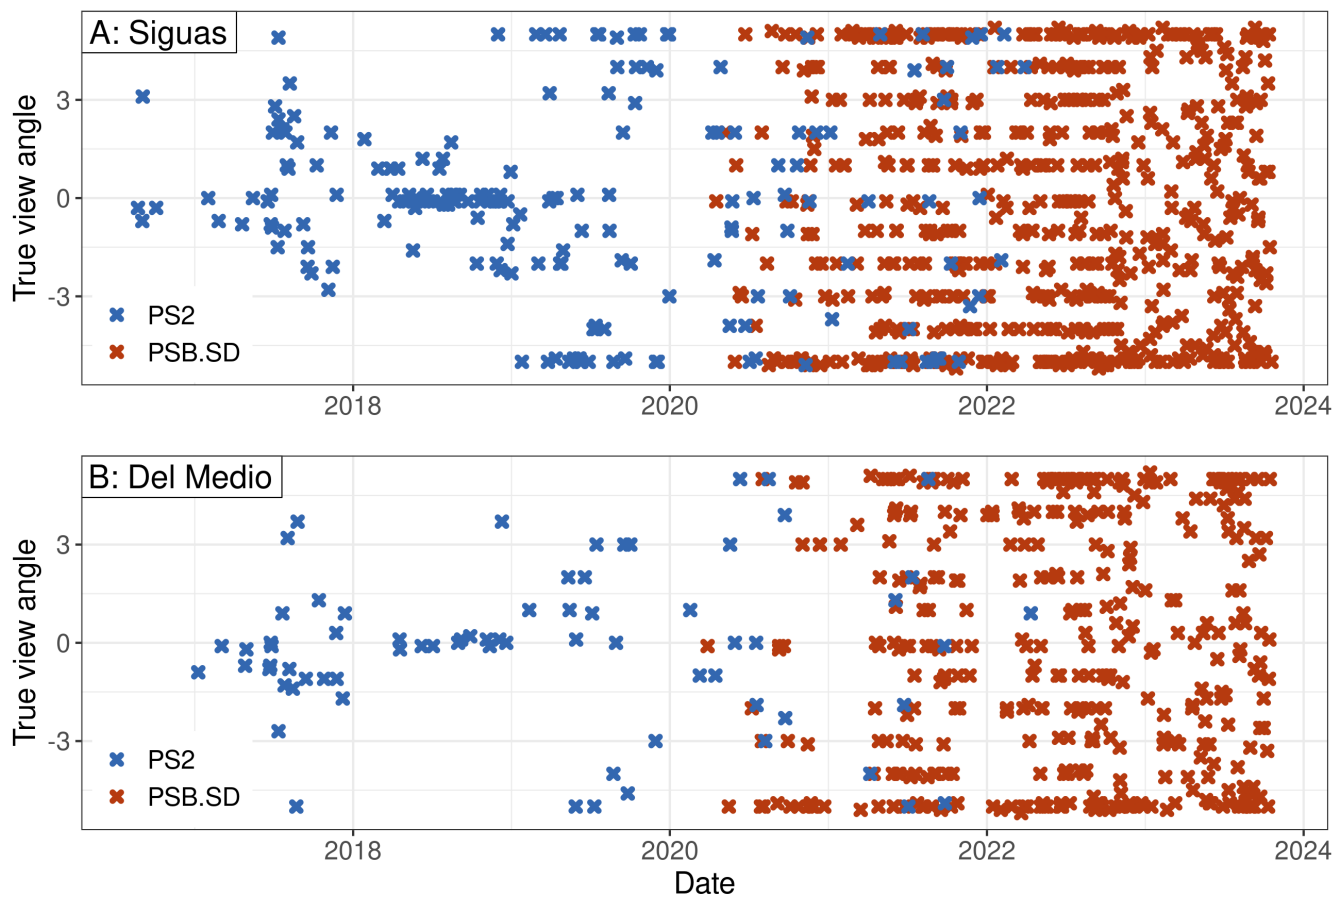

**Figure S14.** PlanetScope data coverage for the Sigwas (A) and Del Medio sites (B) together with true view angles of the acquisition. Eligibility was based on zero cloud cover and full AOI coverage. Colors indicate images acquired by PS2 and PSB.SD instruments. The smaller scene size of PS2 largely limits the available data. Suitable PSB.SD scenes are scarce during the rainy season, notably at the Del Medio site.

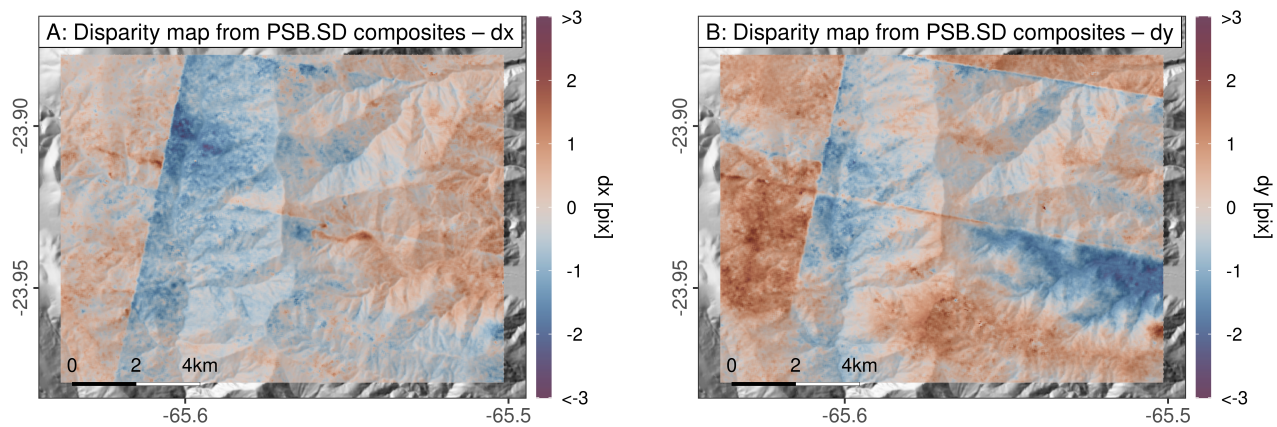

**Figure S15.** Displacement maps in EW and NS direction obtained from two PlanetScope data composites downloaded from the Planet Explorer. The estimated offset clearly reflects the margins of the composited scenes with sudden jumps of approx. 2 pixels. Given these severe artifacts, we recommend to manually improve the stitching process if slow motions across larger study areas are targeted.
